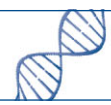

# Genome size rather than content might affect call properties in toads of three ploidy levels (Anura: Bufonidae: *Bufo viridis* subgroup)

MAÏTÉ GUIGNARD†, LUCIE BÜCHI†, MICHAEL GÉTAZ†,  
CAROLINE BETTO-COLLIARD and MATTHIAS STÖCK\*

Department of Ecology and Evolution, University of Lausanne, Biophore, CH-1015 Lausanne, Switzerland

Received 26 August 2011; revised 2 October 2011; accepted for publication 3 October 2011

In vertebrates, genome size has been shown to correlate with nuclear and cell sizes, and influences phenotypic features, such as brain complexity. In three different anuran families, advertisement calls of polyploids exhibit longer notes and intervals than diploids, and difference in cellular dimensions have been hypothesized to cause these modifications. We investigated this phenomenon in green toads (*Bufo viridis* subgroup) of three ploidy levels, in a different call type (release calls) that may evolve independently from advertisement calls, examining 1205 calls, from ten species, subspecies, and hybrid forms. Significant differences between pulse rates of six diploid and four polyploid ( $3n$ ,  $4n$ ) green toad forms across a range of temperatures from 7 to 27 °C were found. Laboratory data supported differences in pulse rates of triploids vs. tetraploids, but failed to reach significance when including field recordings. This study supports the idea that genome size, irrespective of call type, phylogenetic context, and geographical background, might affect call properties in anurans and suggests a common principle governing this relationship. The nuclear-cell size ratio, affected by genome size, seems the most plausible explanation. However, we cannot rule out hypotheses under which call-influencing genes from an unexamined diploid ancestral species might also affect call properties in the hybrid-origin polyploids. © 2012 The Linnean Society of London, *Biological Journal of the Linnean Society*, 2012, 105, 584–590.

ADDITIONAL KEYWORDS: advertisement calls – cell size – evolution – release calls.

## INTRODUCTION

Although ‘next-generation sequencing transforms today’s biology’ (Schuster, 2008) we have still only relatively vague ideas about how genome size rather than informational content might influence evolution (e.g. Bennetzen & Kellogg, 1997; Zuckerkandl, 2002). In vertebrates, genome size shows correlation with nuclear and cell sizes in several tissues and taxonomic groups (Olmo, 1983; Gregory, 2003), including an inverse relationship with brain complexity (Roth, Blanke & Wake, 1994; Wake, Wake & Specht, 2011). Recently evolved polyploids might help to better test the influence of genome size on various evolutionary

features. With the probable exception of mammals (Svartman, Stone & Stanyon, 2005) and some single birds (e.g. Tiersch, Beck & Douglass, 1991), natural polyploid vertebrates occur rarely but are phylogenetically widespread among teleosts (Le Comber & Smith, 2004), amphibians (Bogart, 1980; Schmid, 1980; Kawamura, 1984; Mable, Alexandrou & Taylor, 2011), and reptiles (Kearney, Fujita & Ridenour, 2009). Polyploids evolved in urodelan and particularly frequently among anuran amphibians, with the latter reaching as much as do-decaploidy in Pipidae ( $12n$ ; e.g. Evans, 2008). Intriguingly, polyploids in at least three different anuran families produce advertisement calls with longer notes and intervals than their diploid counterparts. Such lower ‘pulse rates’ (call-notes per unit of time) in polyploids have been found in Hylidae (Bogart & Wasserman, 1972; Ralin, 1977;

\*Corresponding author. E-mail: matthias.stoeck@unil.ch

†These authors contributed equally to the paper.

Mable & Bogart, 1991; McLister, Stevens & Bogart, 1995; Keller & Gerhardt, 2001), Leptodactylidae (Bogart & Wasserman, 1972; Martino & Sinsch, 2002), and Bufonidae (Tandy *et al.*, 1982; Castellano *et al.*, 1998, 2002; Stöck, 1998).

Bogart & Wasserman (1972) hypothesized that polyploidy affects calls through changes in cellular dimensions or tissue mass or density, as later emphasized by Ralin (1977). Artificially produced autoployploid tree frogs (*Hyla japonica*) supported this hypothesis, as mean pulse rate in triploids was about 10% lower than in diploids, and in tetraploids was about 20% lower than in diploids (Ueda, 1993). Accordingly, reviewing anuran vocalization, Gerhardt (1994) discussed Bogart & Wasserman's (1972) idea as plausible. For hylid frogs, Keller & Gerhardt (2001) found the cell-size hypothesis confirmed in several independently arisen polyploid lineages (Ptacek, Gerhardt & Sage, 1994; Holloway *et al.*, 2006), as well as in some artificially produced autotriploids, and 'concluded that both a direct effect of polyploidy and genotypic divergence (. . .) contributed to the contemporary differences'. Artificially produced autotriploid females show a shift in pulse-rate preference in the direction of the pulse rate produced by males of the tetraploid species (Tucker & Gerhardt, in press).

To test whether this pulse rate – ploidy relationship also occurs in release calls that are supposedly less constrained by sexual selection and may evolve independently from advertisement calls (Castellano *et al.*, 2002), we examined release calls across the radiation of Palearctic green toads (*Bufo viridis* subgroup) involving three natural ploidy levels.

MATERIAL AND METHODS

STUDY ANIMALS AND CALL RECORDINGS

We examined calls from 66 males of eight green toad forms and species representing most phylogenetic clades of the *B. viridis* subgroup (Stöck *et al.*, 2006), several of which represent polyploids of known or hypothetical hybrid origin (Stöck *et al.*, 2010). Ploidy of Asian and most European toads was determined by flow cytometry of blood samples (Stöck *et al.*, 2010) or karyotyping (Stöck *et al.*, 2005), or was inferred from microsatellite data (Colliard *et al.*, 2010). A total of 1205 release calls (Table 1 and Supporting Information, S1) were recorded in the field (450 calls; mostly between 20 and 28 °C; Central Asia, Europe) or in the laboratory (755 calls; at 7, 12, 17, 22, or 27 °C; constant air temperature of 22.5 °C. The toads were given 30 min to adjust to each temperature in a series of water baths. We stimulated the elicitation of release calls by holding the toad behind its forelimbs between human thumb and finger as described

Table 1. Taxa, locality of origin, and ploidy levels of toads (geographical information follows Stöck *et al.*, 2001, 2006, 2010)

| Taxon                                    | No. of individuals recorded in the field | No. of individuals recorded in the laboratory | No. of calls | Ploidy | Locality                                                  |
|------------------------------------------|------------------------------------------|-----------------------------------------------|--------------|--------|-----------------------------------------------------------|
| <i>B. balearicus</i> × <i>B. siculus</i> | 1                                        | 2                                             | 87           | 2n     | Laboratory F <sub>1</sub> -hybrid                         |
| <i>B. shaartustensis</i>                 | 4                                        | 3                                             | 252          | 2n     | Tajikistan (Shaartuz)                                     |
| <i>B. siculus</i>                        | –                                        | 1                                             | 73           | 2n     | Italy, Sicily (Palermo)                                   |
| <i>B. turanensis</i>                     | 3                                        | –                                             | 53           | 2n     | Iran (Gholaman, Kapkan, NE of Gonbad-e-Kavus)             |
| <i>B. variabilis</i>                     | 5                                        | 1                                             | 105          | 2n     | Albania (Dürrosh), Iran (Kerman)                          |
| <i>B. viridis viridis</i>                | 28                                       | –                                             | 165          | 2n     | Germany (Halle)                                           |
| <i>B. baturae</i>                        | 2                                        | 3                                             | 129          | 3n     | Pakistan (Gilgit, Pasu)                                   |
| <i>B. turanensis</i> × <i>B. pewzowi</i> | –                                        | 1                                             | 51           | 3n     | Kyrgyzstan (S of Bishkek)                                 |
| <i>B. oblongus</i>                       | 1                                        | –                                             | 28           | 4n     | Iran (Baghestan, Birjand)                                 |
| <i>B. pewzowi</i>                        | 9                                        | 3                                             | 262          | 4n     | China (Kashgar), Kyrgyzstan (Naryn), Uzbekistan (Nuratau) |

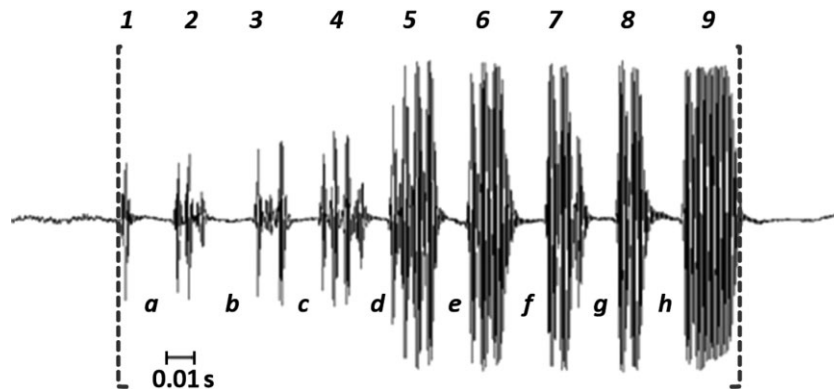

**Figure 1.** Example of a release call of Palearctic green toads of the *Bufo viridis* subgroup. *Bufo baturae* (Gilgit, Pakistan, at 22 °C): numbers 1–9 indicate notes, where 1 and 9 are the first and last note, respectively. Letters a–h represent internote intervals; interval c in this call measures 10 ms. The start and end of the release call are indicated by the dashed lines.

(Brown & Littlejohn, 1972; Leary, 2001), 1–2 cm in front of a microphone (ME 66, module K6, Sennheiser), and recorded calls on a Dell Latitude laptop. Measurements were performed using Avisoft Bioacoustics SASLab software (Specht, Berlin, Germany; <http://www.avisoft.com/>).

For each call with at least four pulses, we measured two parameters in the oscillogram: the call duration (beginning of first to end of the last pulse) and the number of pulses (Fig. 1). Pulse rate was obtained by dividing the number of pulses by the call duration.

#### STATISTICAL ANALYSIS

Statistical analyses were performed using R 2.10.1 (R Development Core Team, 2009). Median values of parameters were computed for each temperature and individual, as some emitted more calls than others, resulting in a total of 115 values (63 from the laboratory, 52 from the field). As laboratory temperature data appeared more reliable than measurements obtained under field conditions, statistical analyses were performed first with laboratory data only, and then for the entire data set, which also served to analyse potential relationships of call duration and number of pulses to ploidy.

To test how ploidy affects pulse rate, call duration, and number of pulses, we first had to remove the effect of temperature, on which temporal call parameters depend in poikilothermic anurans. To do this, we performed for each parameter (pulse rate, call duration, number of pulses) a linear regression as a function of body temperature and computed the residuals. Then, to obtain only a single value per individual, regardless of temperature, we calculated individual average residuals. Finally, to test if ploidy affects pulse rate, a one-way ANOVA was computed for the mean pulse rate residuals of each individual,

with ploidy as a fixed factor. To understand whether differences not only might exist between diploids ( $2n$ ) and polyploids ( $3n$ ,  $4n$ ), which could result from absence vs. presence of call-affecting genes in a second genome of hybrid-origin allopolyploids (Stöck *et al.*, 2010), but also between triploids ( $3n$ ) and tetraploids ( $4n$ ), two comparisons were performed using *t*-tests: diploids vs. polyploids and triploids vs. tetraploids.

#### RESULTS

Laboratory data revealed an inverse relationship between pulse rate and ploidy (Table 2, Fig. 2), characterized by a significant effect of ploidy on the mean residual pulse rate ( $F = 16.130$ ,  $P < 0.001$ ; Fig. 2B). In addition, *t*-tests supported significant effects of ploidy on both differences between diploids vs. polyploids ( $t = 5.14$ , d.f. = 12,  $P < 0.001$ ), and triploids vs. tetraploids ( $t = 3.69$ , d.f. = 5,  $P = 0.014$ ).

Differences were also obtained between diploids and polyploids for the whole data set, although we failed to find significant differences between triploids and tetraploids (Table 2, supporting Fig. S1). Similar results were observed for the analysis of call duration (Table 2; supporting Fig. S2) and number of pulses (Table 2; supporting Fig. S3).

#### DISCUSSION

While anuran advertisement calls evolve under sexual selection through female choice (e.g. Ryan, 1985), release calls are closer to aggressive calls (Gerhardt, 1994), and serve as sex identification signals, which warn males to dismount erroneously clasped conspecific or interspecific males (Brown & Littlejohn, 1972). No correlation between pulse rates of advertisement and release calls was found within *Bufo*

**Table 2.** Results of statistical comparisons according to main text, Figure 1 and supporting information, Figs S1–S3

| Data                 | Parameter     | Tests performed for: |                |           |
|----------------------|---------------|----------------------|----------------|-----------|
|                      |               | Ploidy               | 2n vs. 3n + 4n | 3n vs. 4n |
| Laboratory only      | Pulse rate    | < 0.001              | < 0.001        | 0.014     |
| Laboratory and field | Pulse rate    | 0.008                | 0.002          | 0.436     |
|                      | Call duration | < 0.001              | < 0.001        | 0.214     |
|                      | No. of pulses | 0.008                | 0.003          | 0.270     |

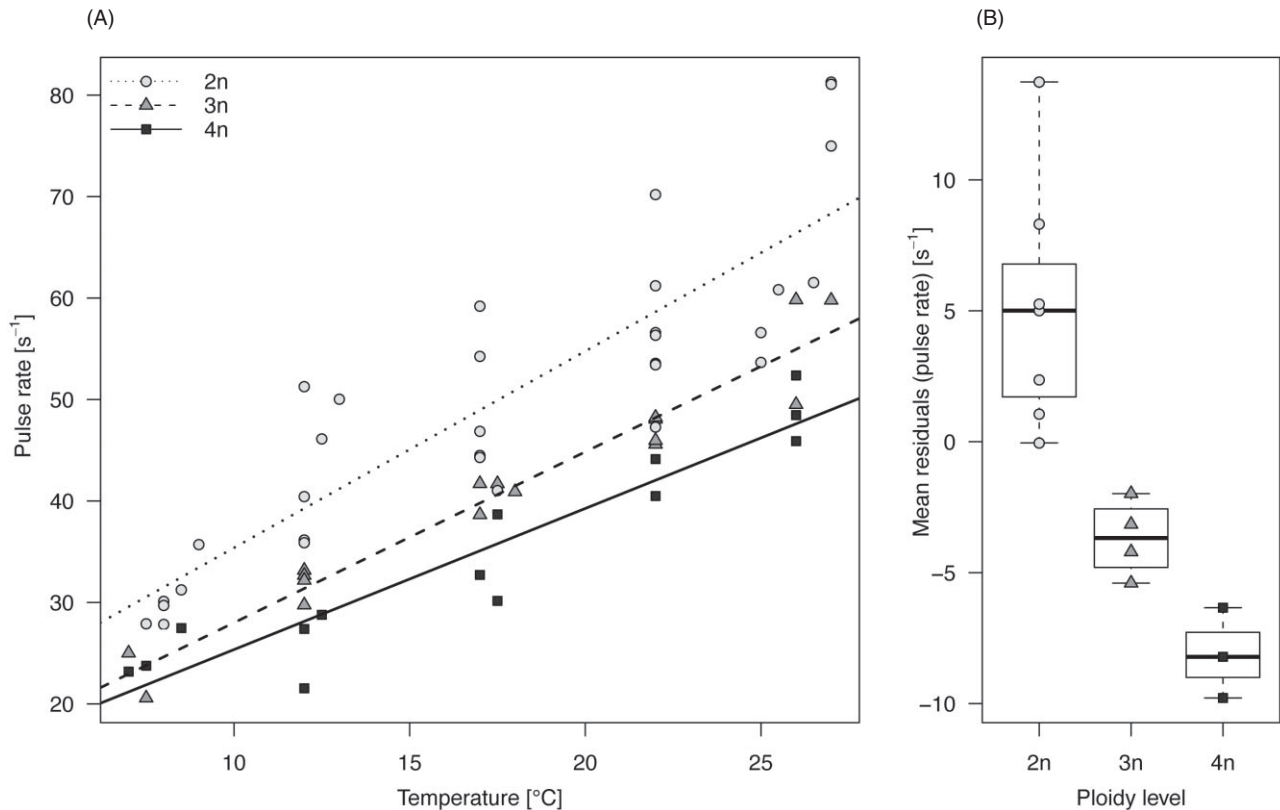

**Figure 2.** Pulse rate of release calls in relation to temperature and ploidy level. A, pulse rate as a function of temperature for the laboratory measurements. Lines are regressions of pulse rate on temperature for each ploidy level. B, box-plots of mean pulse rate residuals as a function of ploidy level.

*americanus* (Sullivan, 1992), *Bufo valliceps* (Sullivan & Wagner, 1988), and green toads (Castellano *et al.*, 2002), suggesting independent evolution of both call types. Therefore, the relationship between ploidy and pulse rate found by us might support the idea that genome size, irrespective of call type, phylogenetic context, and geographical background, affects call properties in anurans. Indeed, the six diploid forms, including the interspecies *F*<sub>1</sub>-hybrids (*B. balearicus* × *B. siculus*), showed significantly higher pulse rates than the four polyploid (3n, 4n) forms examined. This and previous data on advertisement calls from three anuran families (Introduction) suggest a common

principle to govern this relationship. A proximate explanation provides the hypothesis on cell sizes, which in green toads also have been shown to be larger in polyploid than in diploid forms (Stöck & Grosse, 1997; Stöck *et al.*, 2001).

Castellano *et al.* (2002) found that ‘release calls vary congruently with the phylogeny’ while examining three (two diploid, one tetraploid, but no triploid) species of green toads. However, their allozyme phylogram did not consider the hybrid origin of polyploids, as shown by Mezhzherin & Pisanets (1995), and as later confirmed with nuclear sequence data (Stöck *et al.*, 2010).



We studied only one of two (possibly three?; Stöck *et al.*, 2006) existing tetraploid green toad species under laboratory conditions, and our combined analysis of field and laboratory data failed to show significant differences between calls of triploids and tetraploids. Therefore, we cannot rule out hypotheses under which call-influencing genes from an unexamined diploid ancestral species (e.g. with lower pulse rate) might *also* influence call parameters in allopolyploids. This might be the case in the microhylid genus *Neobatrachus*, where four tetraploid species with at least two independent origins (Mable & Roberts, 1997) 'have calls with (. . .) low pulse rates: broadly similar to calls of diploid *N. fulvus*' (Roberts, 1997). Similarly, within the hylid *Phyllomedusa*, where tetraploids have recently been suggested to be of autotetraploid origin (Brunes *et al.*, 2010), calls of diploids and tetraploids have very similar pulse rates (Haddad, Pombal & Batistic, 1994), but cell sizes have not been reported. Finally, despite previous bioacoustic data of Vigny (1979) pointing to another inverse ploidy to pulse rate relationship (e.g. *Xenopus wittei*  $4n = 72$  and *X. ruwenzoriensis*  $12n = 108$  have lower pulse rates than *X. fraseri*  $2n = 36$ ), Tobias, Evans & Kelly (2011) concluded that 'no call character was significantly correlated with ploidy' in *Xenopus* and *Silurana*. However, despite many fascinating evolutionary and phylogenetic insights of this paper, the lack of temperature data might miss the 'fine-tuning' required to detect the correlation with pulse rate discussed here.

#### ACKNOWLEDGEMENTS

We thank Astrid Koenig and Wolf-Rüdiger Grosse for *B. viridis viridis* recordings; Nicolas Perrin for support (Swiss National Fund, 31003A-129894); and Amélie Dreiss, Dunja K. Lamatsch, Joël Meunier, Anabelle Reber, Pierre Bize, Julien Gianotti, Fabrice Lalubin, and Alexandre Roulin for software, assistance and advice. M.St. is grateful to colleagues who helped during fieldwork in Central Asia (1994–2010). Research permits were provided by Bundesamt für Veterinärwesen BVET Nr. 1245/10, Bern, and no. 1798, Service de la consommation et des affaires vétérinaires, Epalinges, Switzerland.

#### REFERENCES

- Bennetzen JL, Kellogg EA. 1997.** Do plants have a one-way ticket to genomic obesity? *The Plant Cell* **9**: 1509–1514.
- Bogart JP. 1980.** Evolutionary implications of polyploidy in amphibians and reptiles. In: Lewis WH, ed. *Polyploidy: biological relevance*. New York: Plenum Press, 341–378.
- Bogart JP, Wasserman AO. 1972.** Diploid–polyploid cryptic species pairs: a possible clue to evolution by polyploidization in anuran amphibians. *Cytogenetics* **11**: 7–24.
- Brown LE, Littlejohn MJ. 1972.** Male release call in the *Bufo americanus* group. In: Blair WF, ed. *Evolution in the genus Bufo*. Austin: University Texas Press, 310–323.
- Brunes TO, Sequeira F, Haddad CFB, Alexandrino J. 2010.** Gene and species trees of a Neotropical group of treefrogs: genetic diversification in the Brazilian Atlantic Forest and the origin of a polyploid species. *Molecular Phylogenetics and Evolution* **57**: 1120–1133.
- Castellano S, Giacoma C, Dujsebaveva T, Odierna G, Balleto E. 1998.** Morphometrical and acoustical comparison between diploid and tetraploid green toads. *Biological Journal of the Linnean Society* **63**: 257–281.
- Castellano SC, Tontini L, Giacoma C, Lattes A, Balleto E. 2002.** The evolution of release and advertisement calls in green toads (*Bufo viridis* complex). *Biological Journal of the Linnean Society* **77**: 379–291.
- Colliard C, Sicilia A, Turrisi GF, Arculeo M, Perrin N, Stöck M. 2010.** Strong reproductive barriers in a narrow hybrid zone of West-Mediterranean green toads (*Bufo viridis* subgroup) with Plio-Pleistocene divergence. *BMC Evolutionary Biology* **10**: 232.
- Evans B. 2008.** Genome evolution and speciation genetics of clawed frogs (*Xenopus* and *Silurana*). *Frontiers in Bioscience* 4687–4706.
- Gerhardt HC. 1994.** The evolution of vocalization in frogs and toads. *Annual Review in Ecology and Systematics* **25**: 293–324.
- Gregory RD. 2003.** Variation across amphibian species in the size of the nuclear genome supports a pluralistic, hierarchical approach to the C-value enigma. *Biological Journal of the Linnean Society* **79**: 329–339.
- Haddad CFB, Pombal JP Jr, Batistic RF. 1994.** Natural hybridization between diploid and tetraploid species of leaf-frogs, genus *Phyllomedusa* (Amphibia). *Journal of Herpetology* **28**: 425–430.
- Holloway AK, Cannatella DC, Gerhardt HC, Hillis DM. 2006.** Polyploids with different origins and ancestors form a single sexual polyploid species. *American Naturalist* **167**: E88–E101.
- Kawamura T. 1984.** Polyploidy in amphibians. *Zoological Science* **1**: 1–15.
- Kearney M, Fujita MK, Ridenour J. 2009.** Lost sex in the reptiles: constraints and correlations. In: Schoen I, Martens K, van Dijk P, eds. *Lost sex: the evolutionary biology of parthenogenesis*. Dordrecht: Springer Scientific Publications, 447–474.
- Keller MJ, Gerhardt HC. 2001.** Polyploidy alters advertisement call structure in gray tree frogs. *Proceedings of the Royal Society B* **268**: 341–345.
- Le Comber SCL, Smith C. 2004.** Polyploidy in fishes: patterns and processes. *Biological Journal of the Linnean Society* **82**: 431–442.
- Leary CJ. 2001.** Evidence of convergent character displacement in release vocalizations of *Bufo fowleri* and *Bufo terrestris* (Anura; Bufonidae). *Animal Behavior* **61**: 431–538.
- Mable BK, Alexandrou MA, Taylor MI. 2011.** Genome

- duplication in amphibians and fish: an extended synthesis. *Journal of Zoology* **284**: 151–182.
- Mable BK, Bogart JP. 1991.** Call analysis of triploid hybrids resulting from diploid–tetraploid species crosses of hylid tree frogs. *Bioacoustics* **3**: 111–119.
- Mable BK, Roberts JD. 1997.** Mitochondrial DNA evolution of tetraploids in the genus *Neobatrachus* (Anura: Myobatrachidae). *Copeia* **1997**: 680–689.
- Martino AL, Sinsch U. 2002.** Speciation by polyploidy in *Odontophrynus americanus*. *Journal of Zoology* **257**: 67–81.
- McLister JD, Stevens ED, Bogart JP. 1995.** Comparative contractile dynamics of calling and locomotor muscles in three hylid frogs. *Journal of Experimental Biology* **198**: 1527–1538.
- Mezhzherin SV, Pisanets EM. 1995.** Genetic structure and origin of the tetraploid toad *Bufo danatensis* Pisanets, 1978 (Amphibia, Bufonidae) from Central Asia: differentiation of geographic forms and genetic relationship between diploid and tetraploid species. *Genetika* **31**: 342–352 (in Russian).
- Olmo E. 1983.** Nucleotype and cell size in vertebrates: a review. *Basic and Applied Histochemistry* **27**: 227–256.
- Ptacek MB, Gerhardt HC, Sage RD. 1994.** Speciation by polyploidy in tree frogs: multiple origins of the tetraploid, *Hyla versicolor*. *Evolution* **48**: 898–908.
- R Development Core Team. 2009.** *R: a language and environment for statistical computing*. Vienna: R Foundation for Statistical Computing.
- Ralin DB. 1977.** Evolutionary aspects of mating call variation in a diploid–tetraploid species complex of treefrogs (Anura). *Evolution* **31**: 721–736.
- Roberts JD. 1997.** Call evolution in *Neobatrachus* (Anura: Myobatrachidae): speculations on tetraploid origins. *Copeia* **1997**: 791–801.
- Roth G, Blanke J, Wake DB. 1994.** Cell size predicts morphological complexity in the brains of frogs and salamanders. *Proceedings of the National Academy of Sciences of the United States of America* **91**: 4796–4800.
- Ryan MJ. 1985.** *The Tungara frog: a study in sexual selection and communication*. Chicago: University of Chicago Press.
- Schmid M. 1980.** Chromosome evolution in amphibia. In: Müller H, ed. *Cytogenetics of vertebrates*. Basel: Birkhäuser, 4–27.
- Schuster SC. 2008.** Next-generation sequencing transforms today's biology. *Nature Methods* **5**: 16–18.
- Stöck M. 1998.** Mating call differences between diploid and tetraploid green toads (*Bufo viridis* complex) in Middle Asia. *Amphibia-Reptilia (Leiden)* **19**: 29–42.
- Stöck M, Frynta D, Grosse WR, Steinlein C, Schmid M. 2001.** A review of the distribution of diploid, triploid and tetraploid green toads (*Bufo viridis* complex) in Asia including new data from Iran and Pakistan. *Asiatic Herpetological Research (Berkeley)* **9**: 77–100.
- Stöck M, Grosse WR. 1997.** Erythrocyte size and ploidy determination in green toads (*Bufo viridis* complex) from Middle Asia. *Alytes (Paris)* **15**: 72–90.
- Stöck M, Moritz C, Hickerson M, Frynta D, Dujsebayaeva T, Eremchenko V, Macey JR, Papenfuss TJ, Wake DB. 2006.** Evolution of mitochondrial relationships and biogeography of Palearctic green toads (*Bufo viridis* subgroup) with insights in their genomic plasticity. *Molecular Phylogenetics and Evolution* **41**: 663–689.
- Stöck M, Steinlein C, Lamatsch DK, Schartl M, Schmid M. 2005.** Multiple origins of tetraploid taxa in the Eurasian *Bufo viridis* subgroup. *Genetica (Springer)* **124**: 255–272.
- Stöck M, Ustinova J, Lamatsch D, Schartl M, Perrin N, Moritz C. 2010.** A vertebrate reproductive system involving three ploidy levels: hybrid origin of triploids in a contact zone of diploid and tetraploid Palearctic green toads (*Bufo viridis* subgroup). *Evolution* **64**: 944–959.
- Sullivan BK. 1992.** Sexual selection and calling behavior in the American Toad (*Bufo americanus*). *Copeia* **1992**: 1–7.
- Sullivan BK, Wagner WE. 1988.** Variation in advertisement and release calls and social influences on calling behavior in the gulf coast toad (*Bufo valliceps*). *Copeia* **1988**: 1014–1020.
- Svartman M, Stone G, Stanyon R. 2005.** Molecular cytogenetics discards polyploidy in mammals. *Genomics* **85**: 425–430.
- Tandy M, Bogart JP, Largen MJ, Feener DJ. 1982.** A tetraploid species of *Bufo* (Anura, Bufonidae) from Ethiopia. *Monitore zoologico italiano N.S., Suppl.* **17**: 1–79.
- Tiersch TR, Beck ML, Douglass M. 1991.** ZZW autotriploidy in a blue-and-yellow macaw. *Genetica* **84**: 209–212.
- Tobias ML, Evans BJ, Kelly DB. 2011.** Evolution of advertisement calls in African clawed frogs. *Behaviour* **148**: 519–549.
- Tucker MA, Gerhardt HC. in press.** Parallel changes in mate-attracting calls and female preferences in autotriploid tree frogs. *Proceedings of the Royal Society B*. Published online 23 November 2011 DOI: 10.1098/rspb.2011.1968.
- Ueda H. 1993.** Mating calls of autotriploid and autotetraploid *Hyla japonica*. *Sciences Reports of the Laboratory of Amphibian Biology of the Hiroshima University* **12**: 177–189.
- Vigny C. 1979.** The mating calls of 12 species and subspecies of the genus *Xenopus* (Amphibia: Anura). *Journal of Zoology (London)* **188**: 103–122.
- Wake DB, Wake MH, Specht CD. 2011.** Homoplasmy: from detecting pattern to determining process and mechanism of evolution. *Science* **331**: 1032–1035 (see also erratum in *Science* 2011, **332**: 36).
- Zuckerandl E. 2002.** Why so many noncoding nucleotides? The eukaryote genome as an epigenetic machine. *Genetica* **115**: 105–129.

### SUPPORTING INFORMATION

Additional Supporting Information may be found in the online version of this article:

**Figure S1.** Pulse rate as a function of temperature for the laboratory and field measurements. Lines are regressions of pulse rate on temperature for each ploidy level.

**Figure S2.** Call duration as a function of temperature for the laboratory and field measurements. Lines are regressions of call duration on temperature for each ploidy level.

**Figure S3.** Number of pulses as a function of temperature for the laboratory and field measurements. Lines are regressions of the number of pulses on temperature for each ploidy level.

**Table S1.** Primary dataset used for this study.

Please note: Wiley-Blackwell are not responsible for the content or functionality of any supporting materials supplied by the authors. Any queries (other than missing material) should be directed to the corresponding author for the article.
